# Supplementary material for: 230 days of ultra long‐term subcutaneous EEG: seizure cycle analysis and comparison to patient diary
Source: PubMed Central journal article supplement (PMC7818131; doi:10.1002/acn3.51261), 2020-12-04
Supplement: ACN3-8-288-s001.pdf [file ACN3-8-288-s001.pdf]

## Supplementary Figures

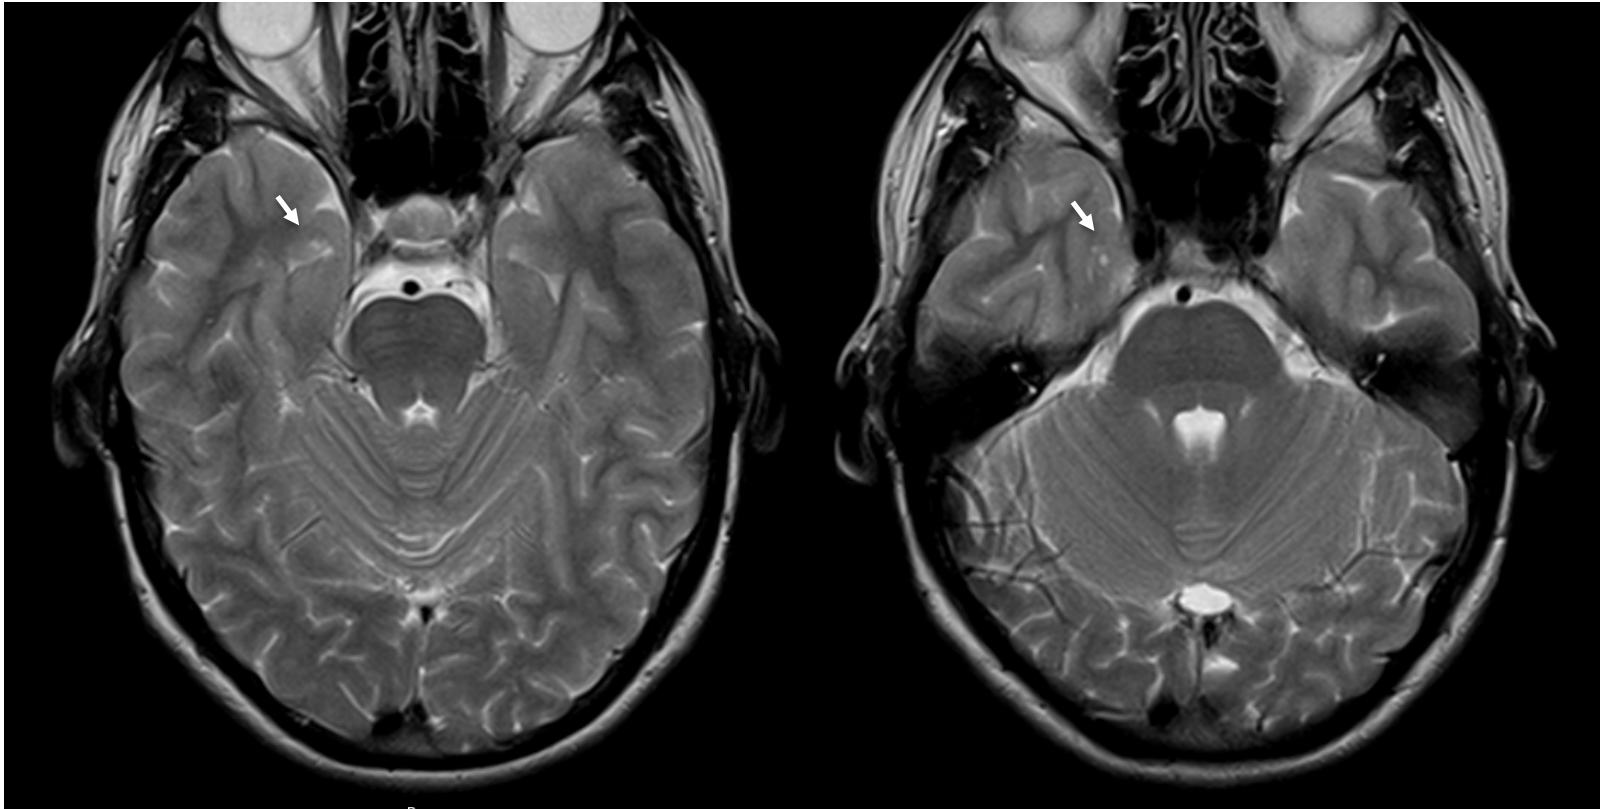

Supplementary Figure 1. T2 Axial Brain MRI slices showing lesion composed of a cluster of small cysts within the right amygdala, with no mass effect and no pathological enhancement, compatible with a dysembryoplastic neuroepithelial tumour (DNET).

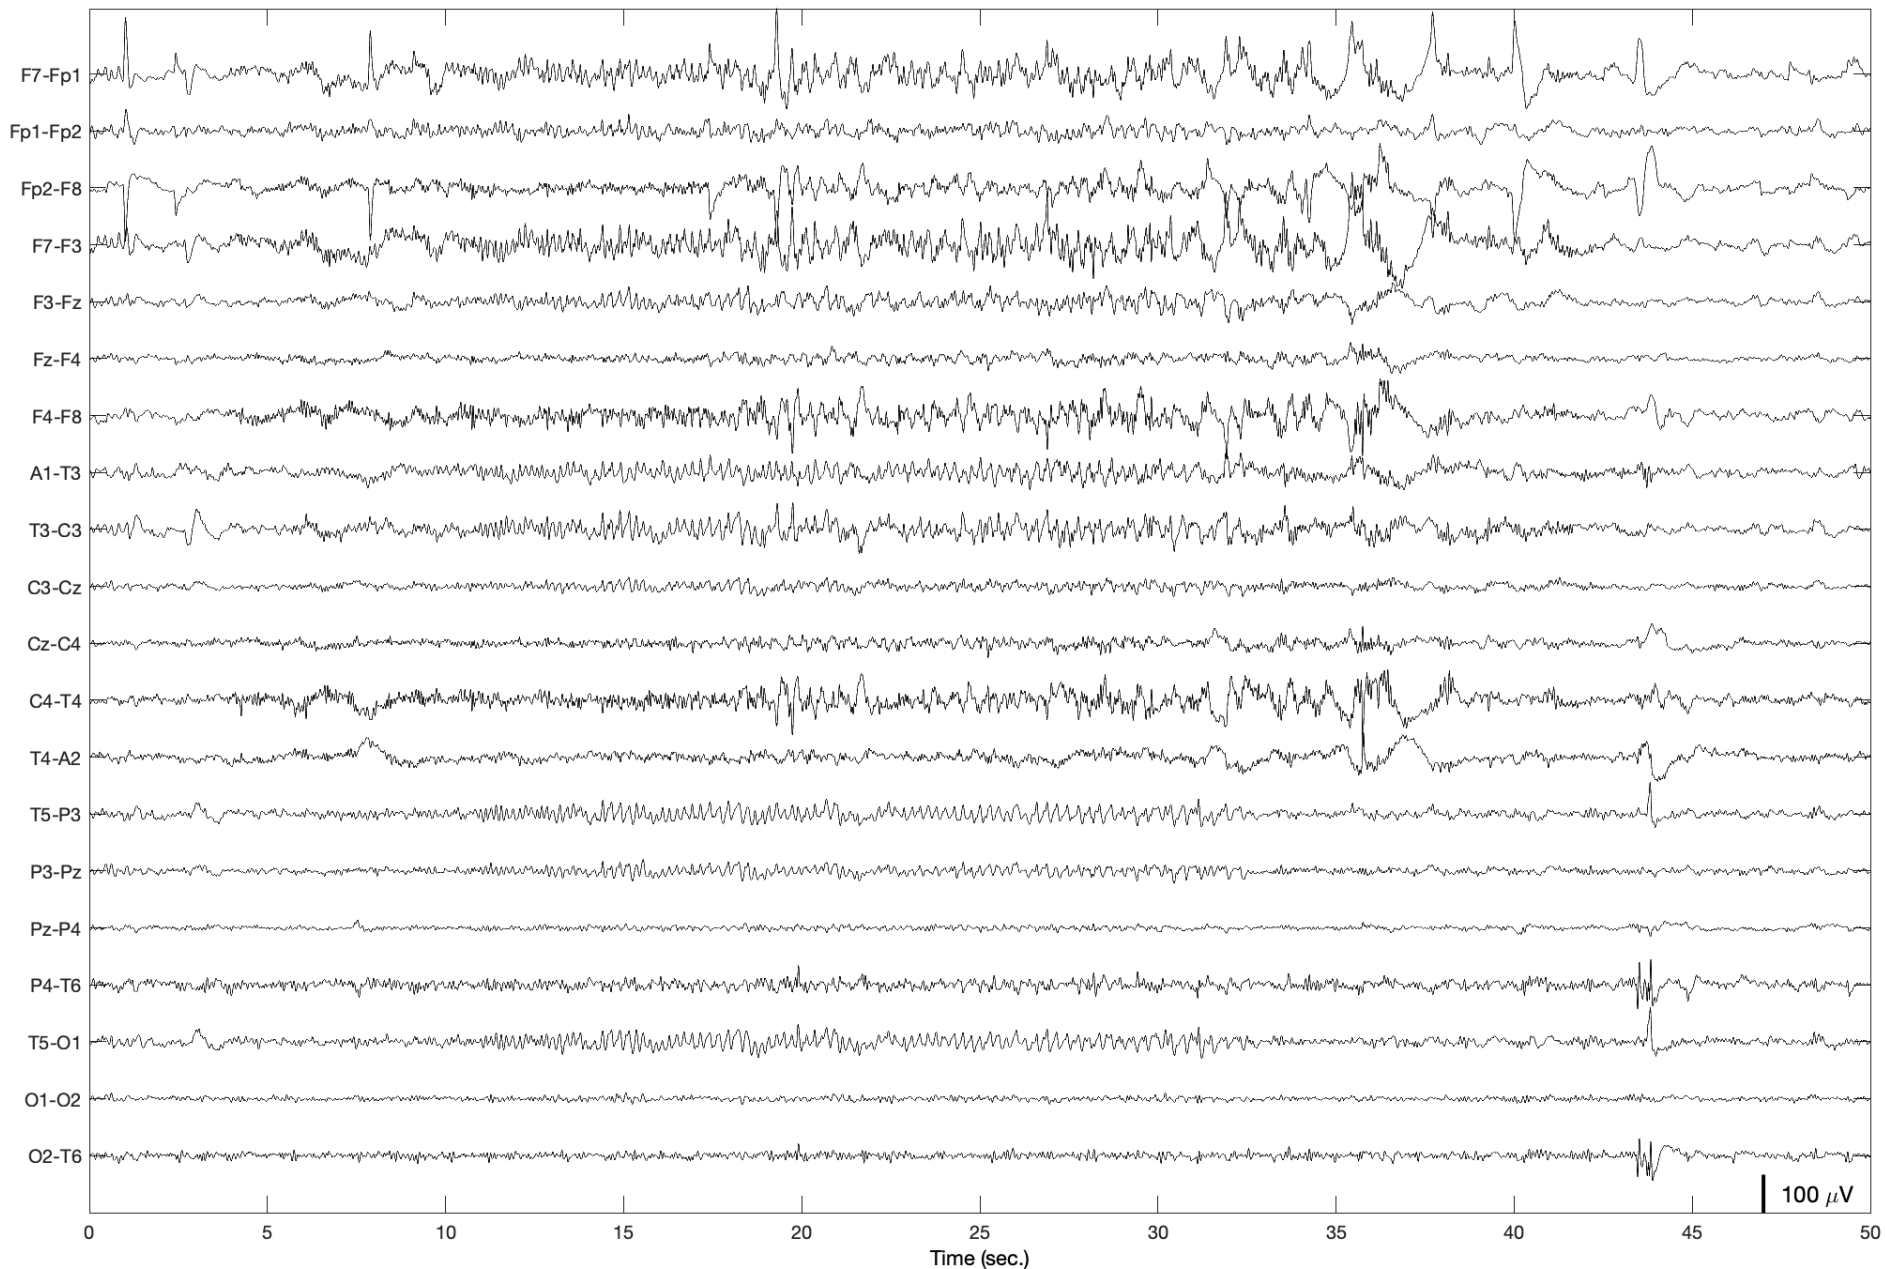

Supplementary Figure 2. Example of a seizure recorded during scalp video-EEG. A theta-delta evolving pattern is seen over the left hemisphere. Sampling rate 256Hz, transverse montage, bandpass filtered at [0.5 20] Hz.
